# Supplementary material for: Estrogen and/or Estrogen Receptor α Inhibits BNIP3-Induced Apoptosis and Autophagy in H9c2 Cardiomyoblast Cells
Source: PubMed Central journal article supplement (PMC5983791; doi:10.3390/ijms19051298), 2018-04-26
Supplement: ijms-19-01298-s001.pdf [file ijms-19-01298-s001.pdf]

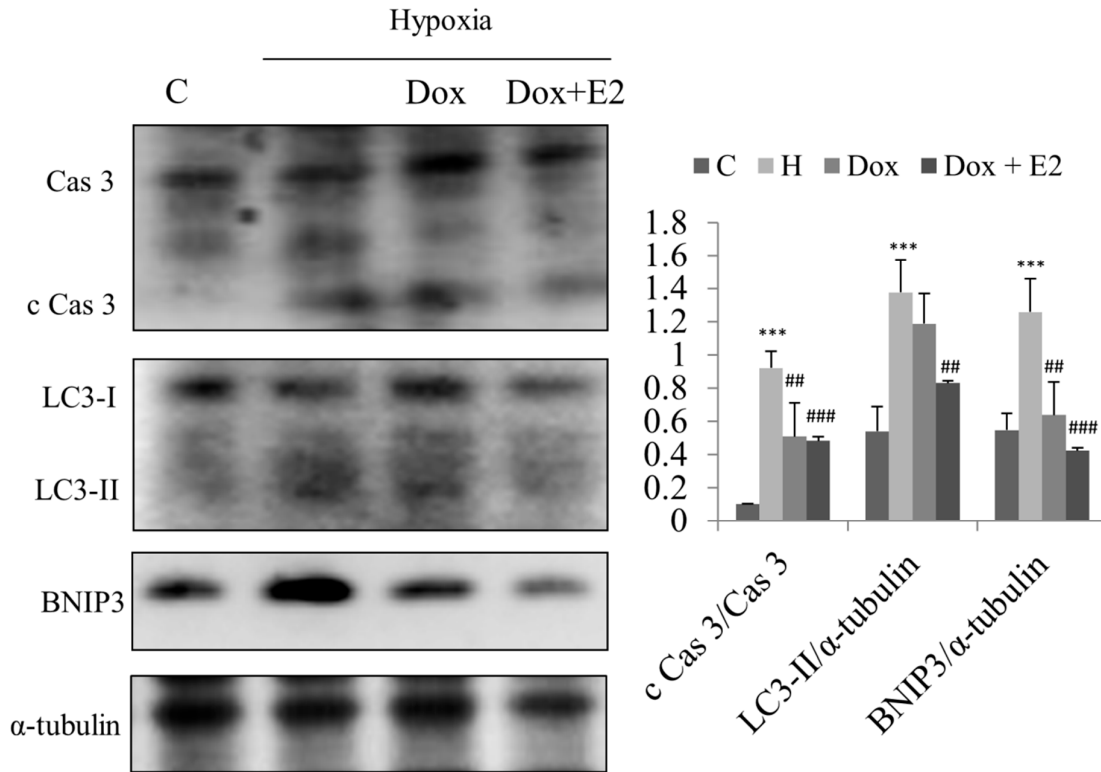

**Supplementary Figure 1.** Effects of Estrogen and Estrogen Receptor on hypoxia induced Caspase 3 activation and LC3-II levels. Representative western blots show the levels of caspase 3, LC3 and BNIP3 in control neonatal rat ventricular myocytes (NRVMs) (C), Hypoxia treated NRVMs, Dox induced ER $\alpha$  expressing NRVMs under hypoxia (Dox), Dox induced ER $\alpha$  expressing NRVMs with Estrogen treatment under hypoxia (Dox + E2).  $n = 3$ , \*\*\* $p < 0.001$  show significant difference with respect to control NRVMs. group; ## $p < 0.01$  and ### $p < 0.001$  show significant difference with respect to control hypoxia group.

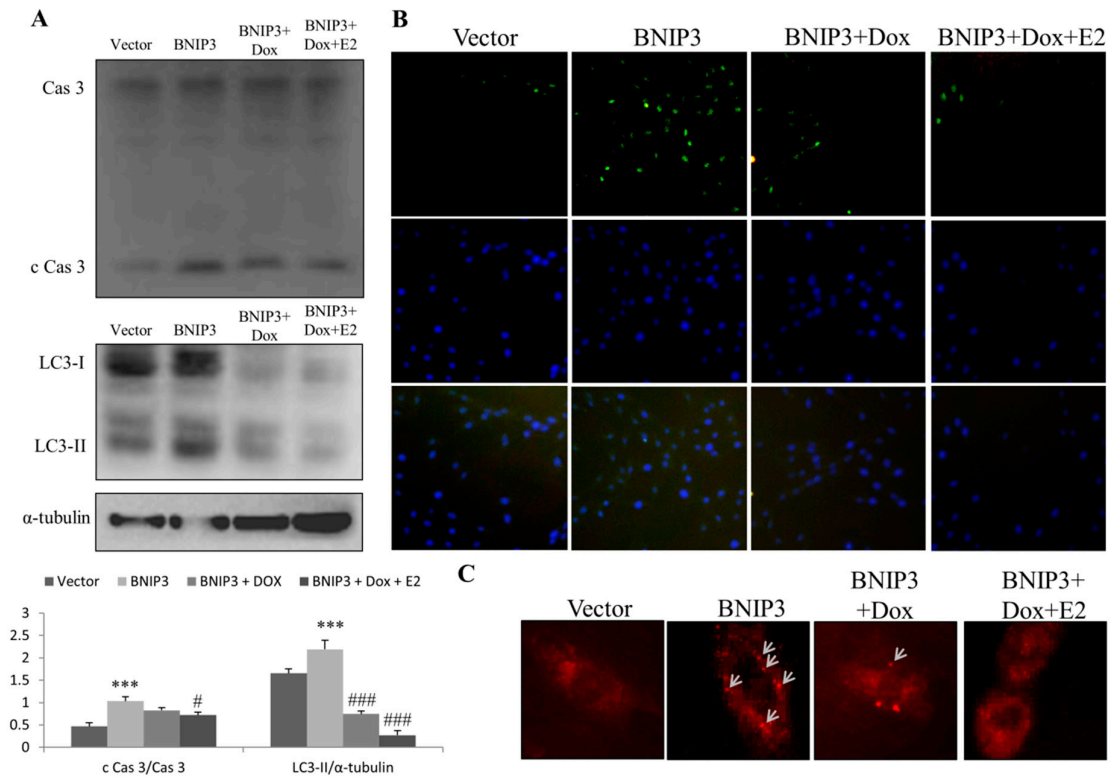

**Supplementary Figure 2.** Effects of Estrogen and Estrogen Receptor on BNIP3 induced Caspase 3 activation and LC3-II levels. A, Representative western blots show the levels of caspase 3 and LC3 and BNIP3 in control neonatal rat ventricular myocytes (NRVMs) transfected with empty vector (Vector), BNIP3 overexpressed NRVMs (BNIP3), Dox induced ER $\alpha$  expressing NRVMs with BNIP3 over expression (BNIP3 + Dox), Dox induced ER $\alpha$  expressing NRVMs with Estrogen treatment and BNIP3 over expression (BNIP3 + DOX + E2). B, Apoptosis levels detected by TUNEL assay. C, LC3 puncta assay to show autophagy levels. White arrows show the LC3 puncta formation in the cells undergoing autophagy  $n = 3$ , \*\*\* $p < 0.001$  show significant difference with respect to control NRVMs. group; # $p < 0.05$  and ### $p < 0.001$  show significant difference with respect to control BNIP3 overexpression group.
